# Evolution of reproductive strategies in incipient multicellularity

Yuanxiao Gao<sup>1</sup>, Yuriy Pichugin<sup>1</sup>, Chaitanya S. Gokhale<sup>2</sup>, and Arne Traulsen<sup>1,\*</sup>

<sup>1</sup>Department of Evolutionary Theory, Max Planck Institute for Evolutionary Biology, August-Thienemann-Str. 2, 24306 Plön, Germany

<sup>2</sup>Research Group for Theoretical Models of Eco-evolutionary Dynamics, Department of Evolutionary Theory, Max Planck Institute for Evolutionary Biology, Plön, Germany

\*Corresponding author: Arne Traulsen, [traulsen@evolbio.mpg.de](mailto:traulsen@evolbio.mpg.de)

## Abstract

Multicellular organisms can potentially show a large degree of diversity in reproductive strategies, as they could reproduce offspring with varying sizes and compositions compared to their unicellular ancestors. In reality, only a few of these reproductive strategies are prevalent. To understand why this could be the case, we develop a stage-structured population model to probe the evolutionary growth advantages of reproductive strategies in incipient multicellular organisms. The performance of reproductive strategies is evaluated by the growth rates of corresponding populations. We identify the optimal reproductive strategy, which leads to the largest growth rate for a population. Considering the effects of organism size and cellular interaction, we found that distinct reproductive strategies could perform uniquely or equally well under different conditions. Only binary-splitting reproductive strategies can be uniquely optimal. Our results show that organism size and cellular interaction can play crucial roles in shaping reproductive strategies in nascent multicellularity. Our model sheds light on understanding the mechanism driving the evolution of reproductive strategies in incipient multicellularity. Meanwhile, beyond multicellularity, our results imply a crucial factor in the evolution of reproductive strategies of unicellular species - organism size.

## 1 Introduction

The evolution of multicellularity is viewed as a major evolutionary transition and it has occurred repeatedly across prokaryotes and eukaryotes (Bonner, 1998; Grosberg and Strathmann, 2007; Rokas, 2008; Claessen et al., 2014; Sebe-Pedros et al., 2017; Brunet and King, 2017). With an increase in organism size, phenotypically heterogeneous organisms emerged through cell differentiation (McCarthy and Enquist, 2005; Arendt, 2008; Brunet and King, 2017). Reproductive modes of multicellular organisms may change with organism size and composition. In principle, multicellular organisms could reproduce multiple offspring with distinct cell numbers and organism composition – in contrast to their unicellular ancestors (Michod and Roze, 1999; Ratcliff et al., 2012; Pichugin et al., 2017, 2019; Gao et al., 2019). The number of possible reproductive modes rapidly increases with organism size. For example, for an organism containing three cells, two reproductive strategies are possible: split into three single-celled newborn organisms ( $1 + 1 + 1$ ) or into a single-celled plus a two-celled newborn organism ( $2 + 1$ ). For an organism containing ten cells, there are 41 such reproductive strategies, and for a twenty-celled organism, there are 626 reproductive strategies. However, only a few reproductive strategies dominate the tree of life. Some prominent examples abound, such as binary fission producing two single-celled organisms, multiple fission producing many single-celled organisms simultaneously (Suresh et al., 1994; Angert, 2005; Flores and Herrero, 2010), fragmentation reproducing many-celled propagules (Ratcliff et al., 2012) and a special bottleneck reproductive strategy, a multicellular organism producing a single-celled

40 newborn organism repeatedly (Grosberg and Strathmann, 1998; Wolpert and Szathmary, 2002; Brunet and King,  
41 2017).

42 The origin and the evolution of reproductive strategies are not well understood. Only a few reproductive  
43 strategies have been considered in previous work. The fragmentation mode of producing many-celled propag-  
44 ules has been investigated, in order to understand cell death in yeast (Libby et al., 2014) or to understand  
45 the advantages of multicellular life cycles experiencing a unicellular stage (Grosberg and Strathmann, 1998;  
46 Michod and Roze, 1999). Previous work has examined the mechanism of life cycle transition from the unicel-  
47 lular stage to the multicellular stage. However, the underlying reproductive strategies are still unknown (Staps  
48 et al., 2019). Recent work has also investigated mixed reproductive strategies (Pichugin et al., 2017, 2019), in  
49 which the fragmentation mode of an organism is not pre-determined, but selected by natural selection from all  
50 fragmentation modes. A subset of reproductive strategies with equal-sized offspring have been investigated in  
51 communities with cooperative interactions and deleterious mutations (Henriques et al., 2021). The majority of  
52 the literature is focused on the reproductive strategies of homogeneous organisms composed of identical cells.  
53 We have recently considered phenotypically heterogeneous organisms (Gao et al., 2019), but cellular interac-  
54 tions were restricted to linear frequency-dependence and we ignored the impact of the organism size. Therefore,  
55 it is still unclear how organism size and cellular interaction, together, can shape reproductive strategies.

56 Organism size confers various advantages to organisms (Kaiser, 2001; Carroll, 2001), such as avoiding  
57 predators (Fisher et al., 2016; Kapsetaki and West, 2019), or incentivising the division of labour (Carroll, 2001;  
58 Matt and Umen, 2016). Meanwhile, organism size can inhibit growth for different reasons, such as competition  
59 for space (Libby et al., 2014) or light (Kapsetaki and West, 2019). Organism size can also affect reproductive  
60 strategies as early as nascent multicellularity (Michod, 2007; Solari et al., 2013; Ratcliff et al., 2012; Libby  
61 et al., 2014). Field observations are ambiguous about the effects of organism size (Yamamoto and Shiah, 2010;  
62 Nielsen, 2006; Li et al., 2014; Wilson et al., 2006; Li and Gao, 2004; Wilson et al., 2010). Here, we consider a  
63 broad scope of size effects that can increase, decrease or not change the growth of heterogeneous organisms.

64 Previous studies have shown that cellular interactions can change reproductive modes (Kaiser, 2001; Solari  
65 et al., 2013; Ratcliff et al., 2012). For example, a new phenotype with a higher death rate leads to a reproductive  
66 mode of producing propagules among yeast *Saccharomyces cerevisiae* (Ratcliff et al., 2012). Phenotypically  
67 heterogeneous organisms could feature diverse cellular interaction forms. Here we study cellular interaction  
68 that depends on a minimum threshold of a specific phenotype of an organism. This cellular interaction form has  
69 frequently been observed in nature. For example, in response to nitrogen depletion, cyanobacteria differentiate  
70 one heterocyst per 10 to 20 vegetative cells (Kumar et al., 2010; Flores and Herrero, 2010). In the genus *Volvox*,  
71 along with the germ-soma differentiation (Matt and Umen, 2016), 1 to 20 germ line cells are produced among  
72 500 and 42,000 somatic cells (Shelton et al., 2012).

73 Thus, both size and composition could affect growth in phenotypically heterogeneous multicellular organ-  
74 isms. We develop a theoretical model to address the evolution of reproductive strategies considering the effects  
75 of size and threshold. The size effects could increase or decrease organism growth, while the organism grows  
76 fast when its cell number of a phenotype of interest meets a given threshold. Organisms in a population share  
77 one common reproductive strategy. Populations differ in reproductive strategies. Reproductive strategies com-  
78 pete with each other via population growth rates. The optimal reproductive strategy maximises the population  
79 growth rate. We found that reproductive strategies can co-exist or can dominate others under different condi-  
80 tions. The uniquely optimal reproductive strategy always produces two offspring units.

## 2 Model

We consider multiple populations in which organisms grow and fragment into smaller pieces (see Fig. 1A). The organisms in each population have a unique reproductive strategy. For example, for a population with maturity size  $N = 3$ , it either has reproductive strategy  $1 + 1 + 1$  or  $2 + 1$ . In a population with  $2 + 1$ , mature organisms with three cells produce a single-celled newborn organism and a two-celled newborn organism. The reproductive strategy determines the organism size at which an organism is born and at which size it is mature and reproduces. For the reproductive strategy  $n_1 + n_2 + \dots + n_M$ , newborn organisms have cell number  $n_i$  ( $i = 1, \dots, M$ ) and maturity size  $N = \sum_{i=1}^M n_i$ . We assume  $n_1 \geq n_2 \geq \dots \geq n_M$ . We consider organisms consisting of two cell types: cooperator and defector. This assumption is inspired by the viability investment of organisms for species in the genus *Volvox*, such as *Pandorina*, *Eudorina*, and *Pleodorina*. At small organism sizes, every cell invests into viability. However, with an increase in the size of the organism some cells gradually decrease their investment into viability (Kirk, 2001, 2005; Matt and Umen, 2016). We refer to the cells contributing to viability as cooperators and the remaining cells as defectors. Newborn organisms

### A. Life cycle

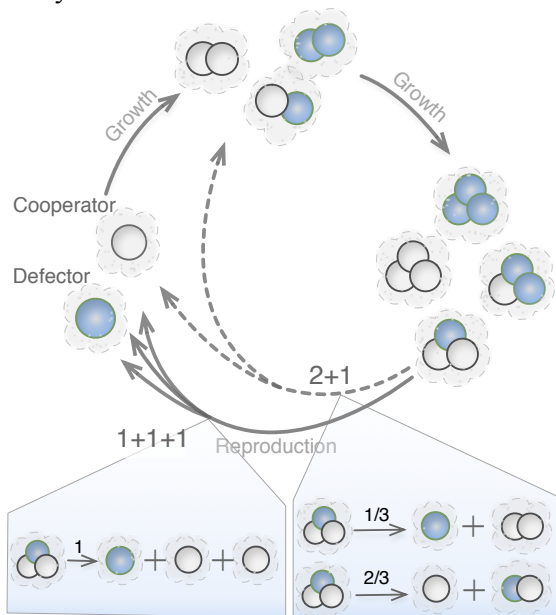

### B. Organism size effects

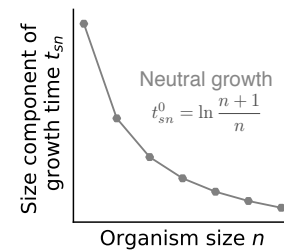

### C. Threshold effects

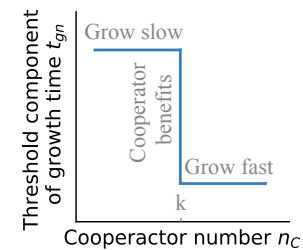

### D. Properties and payoffs of organisms under the reproductive strategy 2+1

|                   |                                         | $k = 2$ |                         |      |                |            |         |
|-------------------|-----------------------------------------|---------|-------------------------|------|----------------|------------|---------|
| State at newborn  | Newborn cell composition                |         |                         |      |                |            |         |
|                   | Payoff                                  |         | 0                       | —    | 0              | 0          | —       |
|                   |                                         |         | —                       | $-c$ | —              | $-c$       | $b - c$ |
|                   | Average payoff                          | 0       | $-c$                    | 0    | $-\frac{c}{2}$ | $b - c$    |         |
| State at maturity | Expected cell composition for $m \ll 1$ |         |                         |      |                |            |         |
|                   | Long-term prospect                      |         | Intermediate beneficial |      |                | Beneficial |         |

**Figure 1: Illustration of a life cycle and the effects of size and threshold.** **A.** Example of life cycles with maturity size three. Organisms with different cell compositions at each size stage are illustrated. Two reproductive strategies are shown:  $1 + 1 + 1$  and  $2 + 1$ . In the shaded area, we show the probabilities of producing different newborn organisms from the mature organism  $(2, 1)$  under  $1 + 1 + 1$  and  $2 + 1$ , respectively (see Appendix 5.1 for the calculation). **B.** The organism size  $n$  affects the growth time of organisms. The grey dots show the neutral condition, where organisms of all sizes have the same growth rate. **C.** Threshold effects on the growth time of organisms. In an organism when the number of cooperators  $n_C$  exceeds the contribution threshold  $k$ , the threshold component of growth time  $t_{gn}$  decreases as in a volunteer dilemma game, see main text. **D.** An example of a population’s newborn organisms and their payoffs under threshold effects. We show the newborn organisms of the population with reproductive strategy  $2 + 1$ . The maturity size  $N = 3$ . The payoff of each cell in an organism and the average payoffs of organisms are given for  $k = 2$ . The expected cell composition describes an organism’s cell composition at maturity for  $m \ll 1$ . Long-term prospect classifies fast-growing newborn organisms into “beneficial” and “intermediately beneficial”, see main text.

94 may differ in their size and composition in a population. For example, the population with  $2 + 1$  has five  
 95 types of newborn organisms:  $(1, 0)$ ,  $(0, 1)$ ,  $(2, 0)$ ,  $(1, 1)$ , and  $(0, 2)$ , where  $(n_D, n_C)$  shows the number of  
 96 defectors  $n_D$  and cooperators  $n_C$ , respectively (see Fig. 1D). Each organism grows incrementally by one cell  
 97 at a time. During each increment, a cell is selected to divide, and two daughter cells are produced. Each  
 98 daughter cell can switch to another phenotype independently with a cell-type switching probability, which is  
 99  $m = 0.01$  in our model. After reaching their maturity size  $N$ , organisms reproduce via random fragmentation  
 100 in terms of organism composition. The probabilities of forming different newborn organisms are calculated in  
 101 Appendix 5.1. The newborn organism follows the same life cycle, growing from newborn to the mature stage,  
 102 see Fig. 1A.

103 We assume that organisms in populations grow independently without density dependence. Thus, popula-  
 104 tions follow exponential growth (Tuljapurkar and Caswell, 1997). The population growth rate  $\lambda$ , depending on  
 105 the number of offspring and the growth time of organisms (De Roos, 2008; Gao et al., 2019), can be calculated  
 106 as in Appendix 5.2. Since we assume no cell death, the number of offspring of each organism is constant,  
 107 depending on its reproductive strategy. For example, with the reproductive strategy  $2 + 1$ , organisms produce  
 108 two offspring after reproduction. Thus, the population growth rate is determined by the time required for the  
 109 newborns to mature. We assume that reproduction is instantaneous. The growth time of an organism is then  
 110 determined by its size and composition as,

$$111 \quad T = \sum_{n=1}^N t_n = \sum_{n=1}^N (t_{sn} \times t_{gn}) \quad (1)$$

112 where the  $t_n$  is the cell increment time for the organism growing from size  $n$  to  $(n + 1)$ .  $t_{sn}$  and  $t_{gn}$  are the size  
 113 component and the threshold component of  $t_n$ . Next, we discuss how we model  $t_{sn}$  and  $t_{gn}$ .

114 The size component  $t_{sn}$  depends on the cell number  $n$  of an organism during growth. Under the neutral  
 115 condition  $t_{sn}^0 = \gamma \ln \frac{n+1}{n}$ , the doubling time of the organism size is independent of the organism size (Gao  
 116 et al., 2019). Thus, organisms of all sizes have the same growth rate, see Fig. 1B. Without loss of generality, we  
 117 chose  $\gamma = 1$ . To analyze size effects beyond the neutral condition, we screen a large number of values of  $t_{sn}$   
 118 around the neutral condition ( $t_{sn}^0$ ), see Fig. 2A. We refer to  $\chi_n = \frac{t_{sn}}{t_{sn}^0}$  as normalised cell increment components,  
 119 where  $n = 1, \dots, N$ . For  $\chi_n = 1$ , we recover the neutral condition.

120 The threshold component  $t_{gn}$  depends on the number of cooperators of an organism. An organism grows  
 121 faster if the number of its cooperators meets a given threshold  $k$ , Fig. 1C. There are many methods to construct  
 122 such compositional threshold effect. Here we choose a volunteer dilemma game (Diekmann, 1985). Consider  
 123 an organism consisting of  $n$  cells with  $n_D$  defectors and  $n_C$  cooperators. When cooperator number  $n_C$  meets  
 124 a contribution threshold  $k$ , each cell gets a benefit  $b$ . Each cooperator pays a cost  $c$  and defectors pay no costs  
 125

126 (Fig. 1D),

$$127 \quad P_D(n_C) = \begin{cases} b & n_C \geq k \\ 0 & n_C < k \end{cases} \quad (2)$$

$$128 \quad P_C(n_C) = P_D(n_C) - c.$$

129 The cell payoffs affect the division probability among these two phenotypes, i.e. which cell is more likely to  
130 divide,

$$131 \quad p_D = \frac{n_D e^{wP_D}}{n_D e^{wP_D} + n_C e^{wP_C}} \quad (3)$$

$$132 \quad p_C = \frac{n_C e^{wP_C}}{n_D e^{wP_D} + n_C e^{wP_C}},$$

133 where  $p_D$  and  $p_C$  are the division probabilities for defectors and cooperators, respectively, and  $w$  is the intensity  
134 of selection (Traulsen et al., 2008). The threshold component  $t_{gn}$  is determined by the payoff  $P_D$  and  $P_C$ ,

$$135 \quad t_{gn} = \left( \frac{n_D e^{wP_D} + n_C e^{wP_C}}{n_D + n_C} \right)^{-1}. \quad (4)$$

137 To analyze such threshold effects, we will vary the contribution threshold value  $k$ .

### 138 3 Results

#### 139 3.1 The effects of organism sizes on reproductive strategies

140 To focus on size effects, we assume no threshold effect,  $w = 0$ . We investigate size effects by perturbing a single  
141 normalised cell increment component  $\chi_n$ , starting from a fully neutral condition  $\chi_n = 1$ , where  $n = 1, \dots, 7$   
142 (see Fig. 2A). If the organisms of a population are going through a perturbed state at size  $n$  i.e.  $n_M \leq n \leq$   
143  $N = \sum n_i$ , then its reproductive strategy ( $n_1 + n_2 + \dots + n_M$ ) deviates from the neutral condition. Since the  
144 population growth rate is inversely proportional to growth time, a perturbation is either advantageous ( $\chi_n < 1$ ,  
145  $\lambda > 1$ ) or disadvantageous ( $\chi_n > 1$ ,  $\lambda < 1$ ) for population growth. A reproductive strategy is referred to as  
146 being promoted (suppressed) when its population growth rate is greater (smaller) than the neutral growth rate  
147 1. A single advantageous perturbation ( $\chi_n < 1$ ) promotes the reproductive strategy of any population with  
148 organisms going through the state  $n$  of the perturbation, i.e. the strategies satisfying  $n_M \leq n \leq N$  (Fig. 2B).  
149 The performance of reproductive strategies is unaffected when their populations' organisms do not go through  
150 the size under perturbations, i.e.  $n < n_M$  or  $n > N$ . A single adverse perturbation  $\chi_n > 1$  suppresses  
151 reproductive strategies that satisfy  $n_M \leq n \leq N$ . Among these affected populations, we found that the  
152 reproductive strategy  $n + 1$  is most affected by perturbations at size  $n$ . Since the population with reproductive  
153 strategy  $n + 1$  contains  $n$ -celled newborn organisms, which mature at size  $n + 1$ , its growth time depends on  
154  $\chi_n$ . Therefore, under the condition of  $\chi_n < 1$  and  $\chi_k = 1$  ( $k \neq n, k = 1, \dots, 7$ ), the reproductive strategy  
155  $n + 1$  is uniquely optimal. At the same time, the reproductive strategy  $n + 1$  is most suppressed for  $\chi_n > 1$ ,  
156 see Fig. 2B. Analogous to the reproductive strategy  $n + 1$ , the reproductive strategy  $n + 2$  is the second most  
157 affected reproductive strategy. Similarly, for the rest of reproductive strategies, their population composition  
158 determines whether the growth rates are affected or not. The growth rates then determine the performance of  
159 reproductive strategies.

160 When we analyzed general size effects which combine single perturbations at different sizes  $n$ , we found  
161 that the normalised cell increment components determine the optimal reproductive strategies. We observed that  
162 the populations of optimal reproductive strategies contain organisms that mostly go through sizes with smaller

163  $\chi_n$ . This is illustrated in Fig. 2C and an analytical proof is given in Appendix 5.3 for reproductive strategies with  
 164  $N \leq 3$ . We found that only the binary-splitting reproductive strategy (producing two offspring) can be uniquely  
 165 optimal (see Fig. 2D and Appendix 5.4 for the analytical proof). Intuitively, this result is apparent because the

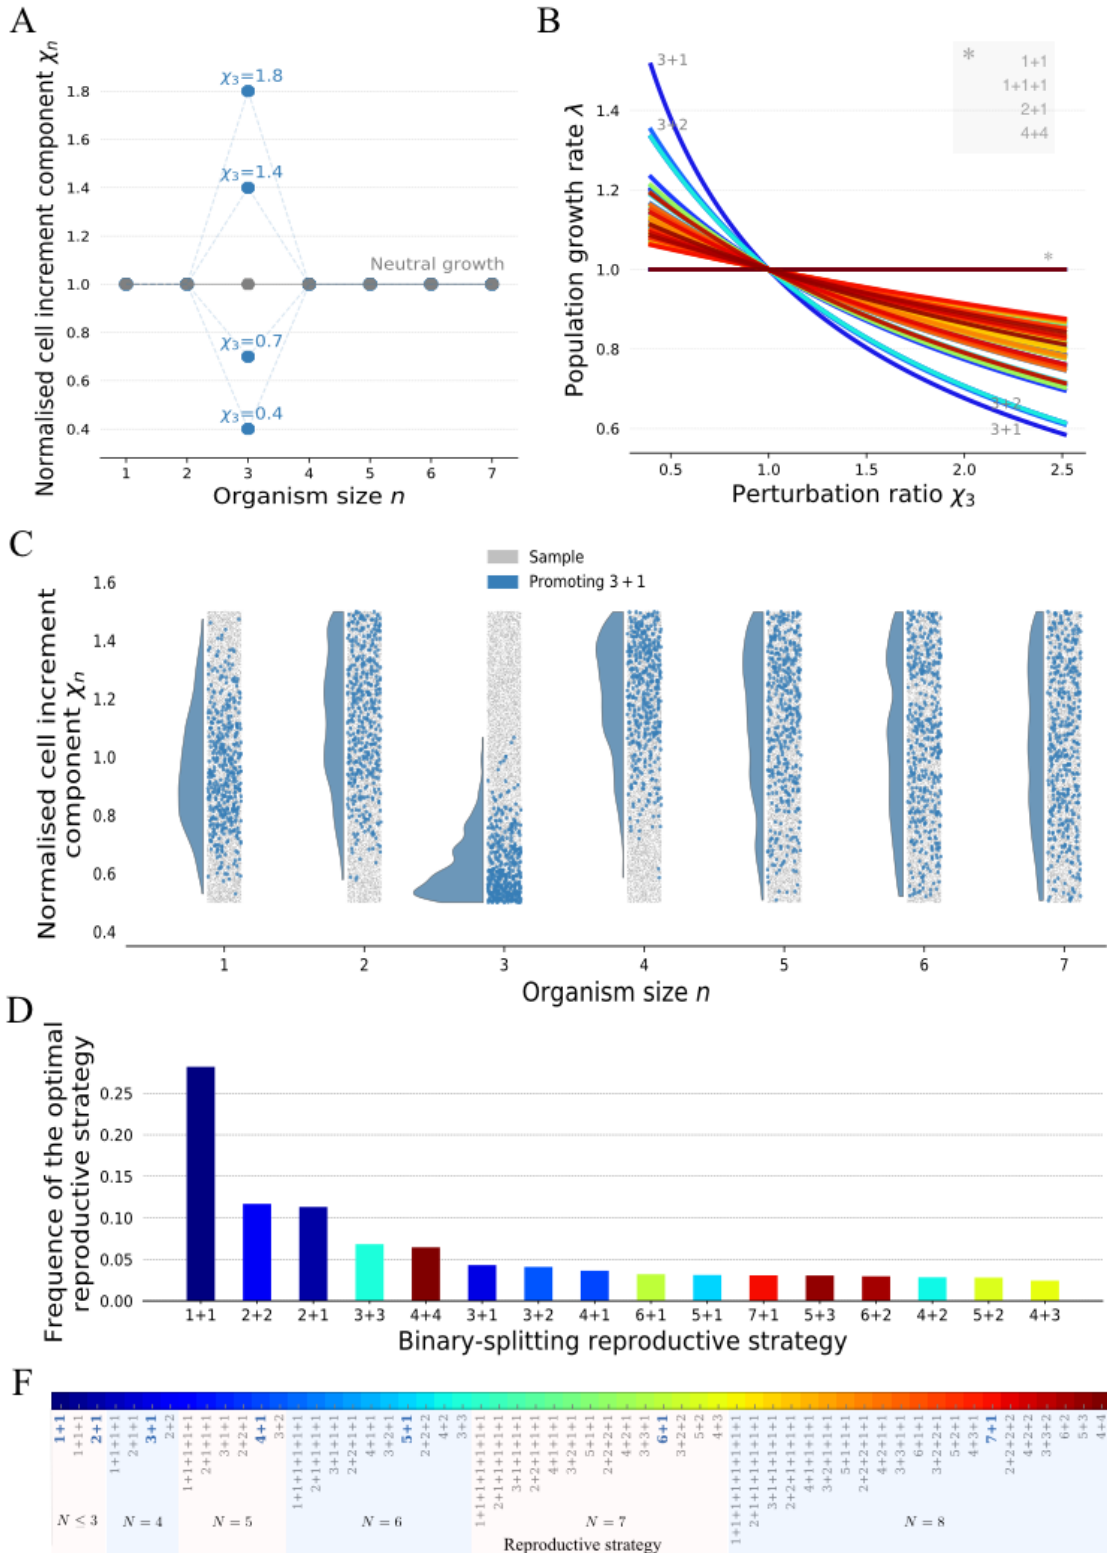

Figure 2: **The binary-splitting reproductive strategies are uniquely optimal under the effects of size.** **A.** A diagram of perturbations at size  $n = 3$ . Grey dots are the conditions for neutral population growth  $\chi_n = 1$ . Blue dots are the perturbed values at size 3 with different strength. **B.** The growth rates of populations with different reproductive strategies under perturbations at size  $n = 3$ . The asterisk \* shows the unaffected reproductive strategies continue to perform equally well. **C.** The distribution of  $\chi_n$  that promote the reproductive strategy 3 + 1 (in blue) among all samples (in grey).  $\chi_n$  are drawn randomly from a uniform distribution, where  $\chi_n = 0.5, \dots, 1.5$ . A sequence of  $[\chi_1, \dots, \chi_7]$  is randomly chosen at a time and the optimal reproductive strategy for it is identified. Ten thousand such sequences are investigated in total. **D.** The frequency of observed optimal reproductive strategies under size effects. **E.** The reproductive strategies that have been investigated for the maturity size  $N \leq 8$ . The reproductive strategies highlighted in bold blue letters are the optimal ones under a single perturbation  $n = 1, \dots, 7$ .

166 fastest-growing newborn organisms in a population with a multiple-splitting reproductive strategy can always be  
167 found in another population with a binary-splitting reproductive strategy. For example, the population growth  
168 rate of  $2 + 1 + 1$  cannot be greater than that of  $1 + 1$ , and  $2 + 2$  at the same time. Additionally,  $1 + 1$  is the  
169 most frequently observed reproductive strategy in binary-splitting reproductive strategies (see Fig. 2D) because  
170  $1 + 1$  is the only reproductive strategy that depends on a single cell increment component  $\chi_1$ . Therefore, for a  
171 randomly chosen  $\chi_n$  ( $n = 1, \dots, 7$ ),  $1 + 1$  has a higher probability to be optimal compared to other strategies.  
172 Generally, reproductive strategies have lower chances to be optimal when binary-splitting makes organisms go  
173 through many cell increment stages.

### 174 3.2 The effects of thresholds on reproductive strategies

175 We assume the size effect to be neutral to investigate threshold effects exclusively:  $\chi_n = 1$ , such that  $t_{sn} =$   
176  $t_{sn}^0$ . With a threshold at size  $k$ , newborn organisms of a population with cooperator number  $n_C \geq k$  have  
177 larger payoffs and thus have shorter growth time, see Eq. (2) and Eq. (4). The growth of different newborn  
178 organisms determines the population growth rate. For example, consider all possible newborn organisms in  
179 the population with the reproductive strategy  $2 + 1$ :  $(1, 0)$ ,  $(0, 1)$ ,  $(2, 0)$ ,  $(1, 1)$  and  $(0, 2)$ , see Fig. 1D. With  
180 the contribution threshold  $k = 2$ ,  $(0, 2)$  grows fastest as it has two cooperators.  $(0, 1)$  is the second-fastest-  
181 growing newborn organism as it most likely gains benefits by producing a second cooperator during growth.  
182  $(1, 0)$ ,  $(1, 1)$  and  $(2, 0)$  grow relatively slow because they are less likely to produce at least two cooperators  
183 during growth. For convenience, we refer to newborn organisms in a population as “beneficial” if  $n_C \geq k$   
184 and “intermediate beneficial” if  $n_C < k$  and  $n_D = 0$ . All other newborn organisms are unlikely to reap the  
185 benefits of cooperation. The growth rate of a population depends primarily on its beneficial newborn organisms  
186 and secondly on its intermediate beneficial newborn organisms. For a low cell-type switching probability, e.g.  
187  $m = 0.01$ , homogeneous newborn organisms are more abundant than heterogeneous ones. In the long run, we  
188 expect that populations mostly contain homogeneous newborn organisms.

189 For threshold effects, the uniquely optimal reproductive strategies are binary-splitting at the maximum ma-  
190 turity size:  $4 + 4$ ,  $5 + 3$ ,  $6 + 2$  and  $7 + 1$  (see Fig. 3A). The optimal reproductive strategies can be classified  
191 into three categories: multiple optima, symmetric binary-splitting  $\frac{N}{2} + \frac{N}{2}$  (or  $\frac{N+1}{2} + \frac{N-1}{2}$ ) and asymmetric  
192 binary-splitting with a  $k$ -celled newborn organism  $(N - k) + k$ . For  $k = 1$ , multiple reproductive strategies are  
193 optimal at the same time, see Fig. 3A, B, and C. Since every population contains beneficial newborn organisms,  
194 the performances of different reproductive strategies are similar. As  $k$  increases, the symmetric binary-splitting  
195 reproductive strategies  $\frac{N}{2} + \frac{N}{2}$  (or  $\frac{N+1}{2} + \frac{N-1}{2}$ ) are optimal for  $1 < k \leq \frac{1}{2}N$ , see Fig. 3A B. Newborn organ-  
196 isms with size equal to or greater than  $k$  have growth advantages, thus intuitively  $\frac{N}{2} + \frac{N}{2}$  and  $k + (k + 1)$  should  
197 have the same performance in population growth. However, we found that only  $\frac{N}{2} + \frac{N}{2}$  (or  $\frac{N+1}{2} + \frac{N-1}{2}$ ) is op-  
198 timal. The intrinsic composition of the population and the effects of cell-type switching probability  $m = 0.01$

199 determines the results. To understand the growth advantages of the symmetric binary-splitting reproductive  
 200 strategies with the maximal maturity size, we take  $4 + 4$  and  $3 + 3$  at  $k = 3$  as an example. For  $k = 3$ ,  
 201 the population of  $4 + 4$  contains the beneficial newborn organisms  $(1, 3)$  and  $(0, 4)$ . The population of  $3 + 3$   
 202 only contains beneficial newborn organisms  $(0, 3)$ . When a cell-type switching event happens during growth,  
 203  $(0, 4)$  reproduces another beneficial newborn organism  $(1, 3)$ , while  $(0, 3)$  reproduces a non-beneficial newborn  
 204 organism  $(1, 2)$ . Populations with larger maturity sizes are less affected by the cell-type switching probability  
 205 as they contain multiple types of beneficial newborn organisms. Finally, when  $\frac{1}{2}N < k < N$ , the reproductive  
 206 strategy  $(N - k) + k$  becomes optimal, see Fig. 2A. When  $k > \frac{1}{2}N$ , populations can at most have one type  
 207 of beneficial newborn organism. Next, we explain why the optimal reproductive strategy is  $(N - k) + k$  rather

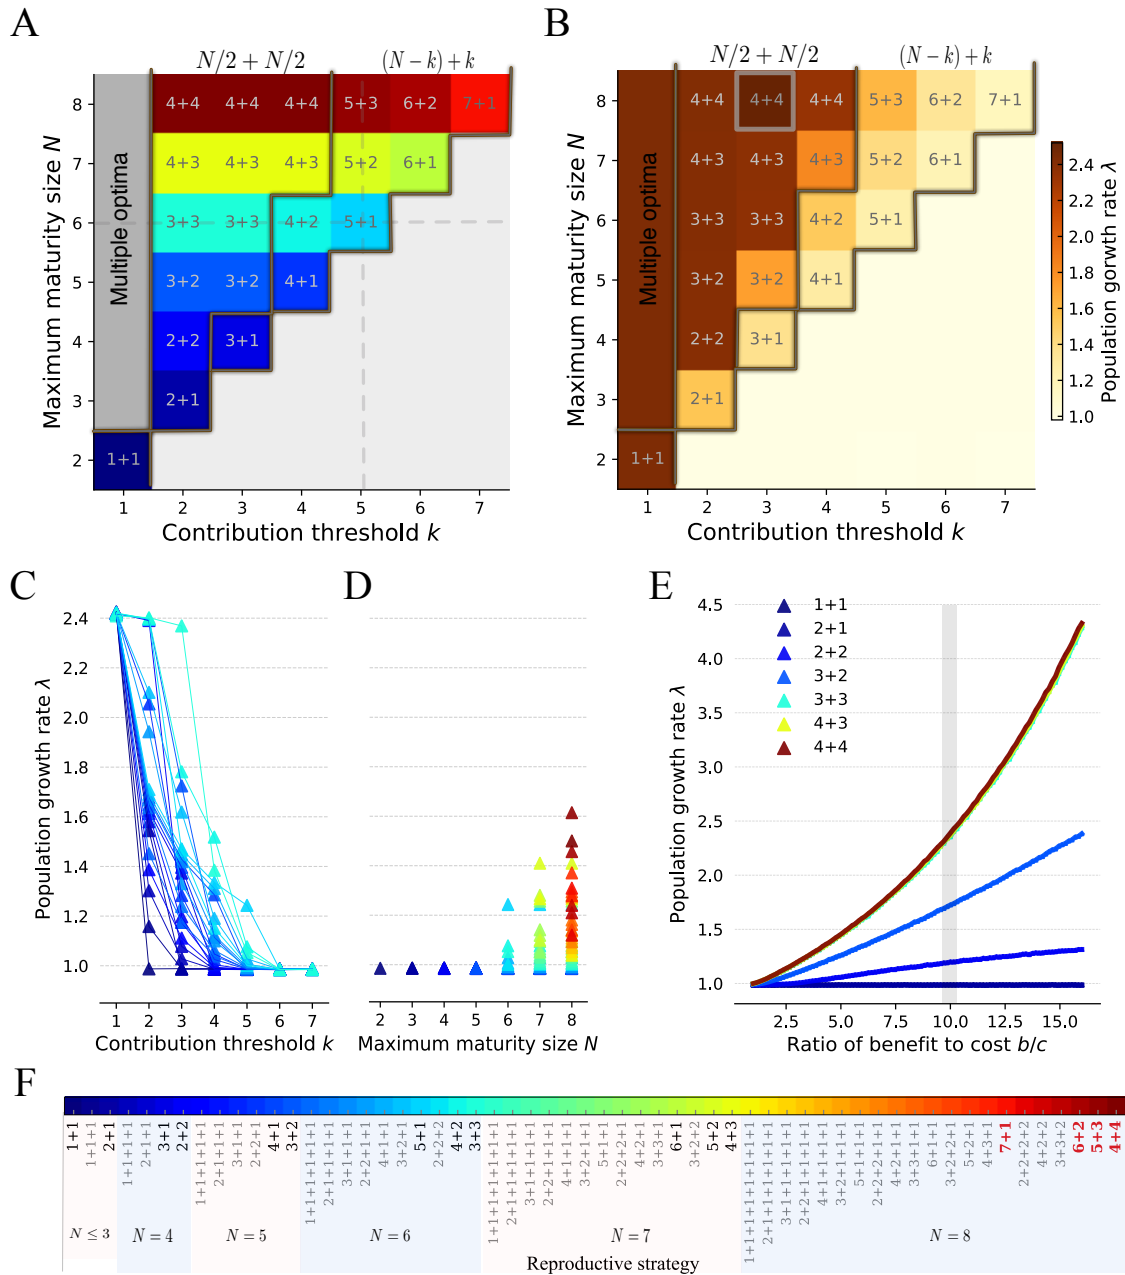



Figure 3: **Binary-splitting reproductive strategies are uniquely optimal for threshold effects with  $k > 1$ .** **A.** The optimal reproductive strategies across contribution threshold  $k$  ( $k < 8$ ) and maturity size  $N$  ( $N \leq 8$ ). The dark brown lines (in panels A and B) are the boundaries between multiple optimal reproductive strategies (at  $k = 1$ ), symmetric binary-splitting reproductive strategies, asymmetric binary-splitting reproductive strategies and the section that the threshold never meet. The grey dashed lines indicate the parameter space where we investigated the population growth rate of each reproductive strategy in panel C and D. **B.** The population growth rates of the optimal reproductive strategies in panel A. The highlighted parameter set with  $N = 8$  and  $k = 3$  is investigated in more detail in panel E. **C.** Population growth rates of different reproductive strategies with  $N \leq 6$  are shown across different contribution threshold  $k$ . **D.** Population growth rates of different reproductive strategies under contribution threshold  $k = 5$  are shown across different maturity size  $N \leq 8$ . **E.** The growth rates of populations with symmetric binary-splitting reproductive strategy are shown across to varying ratios of benefit to cost. **F.** The reproductive strategies that have been investigated for  $k \leq 7$  and  $N \leq 8$ . The optimal populations that appeared in panel A are highlighted in black. The uniquely optimal reproductive strategies under the threshold effect for  $k \leq 7$  and  $N \leq 8$  are highlighted in bold and red. Parameters for all panels  $w = 0.1$ ,  $b = 10$ ,  $c = 1$  and  $m = 0.01$ .

208 than other reproductive strategies such as  $k + \underbrace{1 + 1 \cdots + 1}_{N-k}$  and  $(N - k - 1) + k + 1$ . Because of  $N - k < k$ ,  
 209 organisms with  $N - k$  cells can only form intermediate beneficial newborn organisms –and only when they are  
 210 pure cooperators. Larger intermediate beneficial newborns grow faster than smaller ones. We take  $3 + 1 + 1$   
 211 and  $3 + 2$  under  $k = 3$  as an example.  $3 + 1 + 1$  has the intermediate beneficial newborn organism  $(0, 1)$  and  
 212  $3 + 2$  has the intermediate beneficial newborn organism  $(0, 2)$ . During organism growth,  $(0, 1)$  undergoes two  
 213 cell increment stages with longer time (larger  $t_{gn}$  due to negative payoffs, see Eq. (4) and Eq. (2)), while  $(0, 2)$   
 214 only undergoes a single one. Thus, a population with the reproductive strategy  $3 + 2$  grows faster than one with  
 215  $3 + 1 + 1$ .

216 Population growth rates decrease with increasing  $k$ , resulting from reducing the number of beneficial and  
 217 intermediate beneficial newborn organisms. Especially when  $k \geq N$ , no reproductive strategies will obtain the  
 218 benefits of cooperation, and their populations grow slower due to the associated costs, see Fig. 3A, B. Increasing  
 219 maturity size  $N$  increases population growth rates of the optimal reproductive strategies because the number of  
 220 beneficial or intermediate beneficial newborn organisms increases. As expected, population growth rates also  
 221 increase with the benefit to cost ratio, see Fig. 3B, C, D, and E.

### 222 3.3 The combined effects of organism sizes and thresholds on reproductive strategies

223 Finally, we investigate the optimal reproductive strategies under the size and threshold effects combined. For  
 224 simplicity, we only consider the size effects in the form of a single perturbation. We found that all binary-  
 225 splitting reproductive strategies  $n_i + n_j$  can be uniquely optimal, where  $n_i$  and  $n_j$  are positive integers, and  
 226  $n_i + n_j \leq N$  (see Fig. 4A and B). With the combined effects of size and threshold, we found new optimal  
 227 binary-splitting reproductive strategies that are not optimal either in the effects of single perturbation only or  
 228 for thresholds only, including  $2 + 2$ ,  $3 + 2$ ,  $4 + 2$ ,  $5 + 2$ ,  $3 + 3$  and  $4 + 3$ . Furthermore, under the beneficial size  
 229 perturbation, we found  $n + 1$  ( $n = 1, \dots, 7$ ) can be optimal both at small and large contribution threshold  $k$ ,  
 230 see Fig. 4A and B. This is due to the fact that the threshold effects lead to a similar performance of reproductive  
 231 strategies either at small  $k$  and at large  $k$  (Fig. 3B). Therefore, for combined size and threshold effects, the  
 232 size effects primarily impact the performance of reproductive strategies, see Fig. 4A C. Consequently, the  
 233 reproductive strategy  $n + 1$  becomes optimal under an advantageous perturbation, where  $n = 1, \dots, 7$ . Newly  
 234 emerged binary-splitting reproductive strategies have advantages for intermediate contribution thresholds  $k$ ,  
 235 suggesting that it is an outcome of the trade-off between the effect of size and threshold. For an adverse size  
 236 perturbation, we found the reproductive strategy  $n + 1$  cannot be optimal (Fig. 4B), because the adverse size

237 perturbation leads to poor performance of reproductive strategies that are influenced by the perturbation (see  
 238 Fig. 2B and Fig. 4D). 7 + 1 is an exception to this rule, as the threshold effect strongly influence it at  $k = 7$ .  
 239 The optimal reproductive strategies observed are those that can obtain growth benefits from threshold effects  
 240 and avoid the disadvantages from the adverse size effect. For example, 3 + 3 outcompetes 4 + 4 for  $k = 2$   
 241 when size perturbation occurs at  $n = 7$ . Both strategies can obtain growth advantages from threshold effects.  
 242 However, adverse size perturbation decreases the population growth rate of 4 + 4 but has no impact on 3 + 3.  
 243 Thus the performance of reproductive strategies is the outcome of the trade-off between the effects of size and  
 244 threshold. Our results suggest that all binary-splitting reproductive strategies can evolve under an appropriate  
 245 choice of size effects (at a single size) and threshold effects.

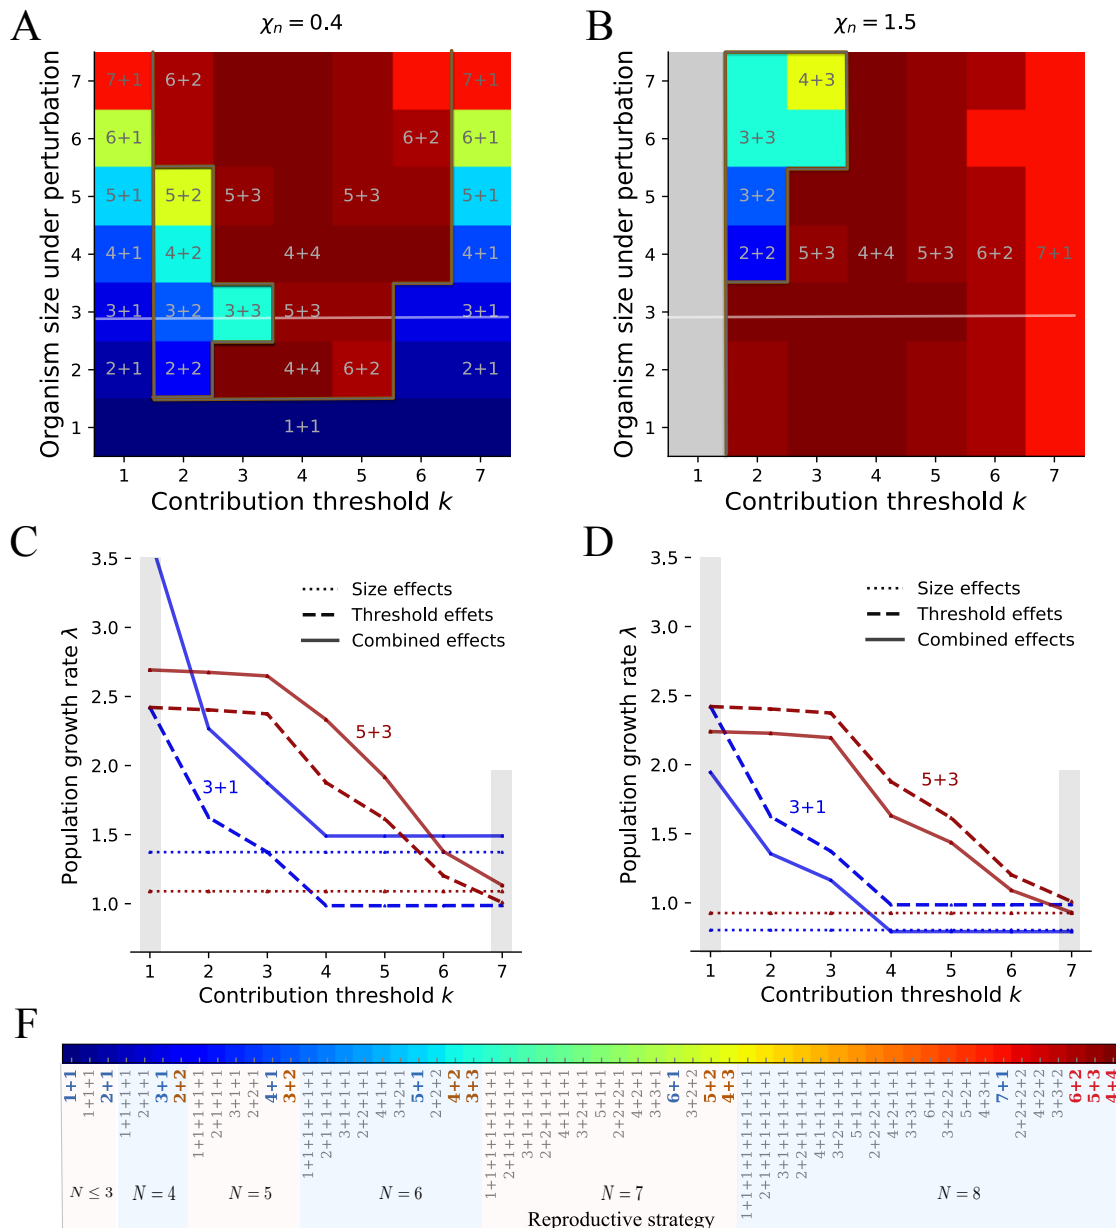

Figure 4: **The binary-splitting reproductive strategies are uniquely optimal under the effects of size with a single perturbation and threshold.** **A.** Optimal reproductive strategies under the effects of single advantages size perturbations and thresholds. **B.** Optimal reproductive strategies under the effects of single adverse size perturbations and thresholds. In panel A and B, the perturbation only occurs at a single size at a time. The dark brown lines indicate the boundaries of optimal reproductive strategies observed under a single perturbation, threshold effects and both. Note that  $7 + 1$  is uniquely optimal under either a single perturbation or threshold effects. Reproductive strategies are multiple-optimal under the grey area. The white lines indicate the parameter space where we investigate the population growth rate in panel C and D. **C** and **D.** The population growth rates of reproductive strategies  $1 + 3$  and  $3 + 5$  under the effects of a size perturbation at  $n = 3$ , threshold and both, respectively. In A and C,  $\chi_n = 0.4$ . In B and D,  $\chi_n = 1.5$ . **F.** The reproductive strategies that have been investigated for  $k \leq 7$  and  $N \leq 8$ . The reproductive strategies in blue are uniquely optimal under the size effect of a single perturbation. The reproductive strategies in red are uniquely optimal under the threshold effects. The reproductive strategies in brown are newly emerged uniquely optimal strategies under both a single perturbation and the threshold effect. Parameters for all panels  $w = 0.1$ ,  $b = 10$ ,  $c = 1$ ,  $m = 0.01$ .

## 246 4 Discussion

247 Numerous reproductive strategies are conceivable for multicellular organisms, but only recently more atten-  
248 tion has been paid to the evolution of reproductive strategies (Tarnita et al., 2013; Pichugin et al., 2017, 2019;  
249 Staps et al., 2019; Gao et al., 2019; Pichugin and Traulsen, 2020). Here, we developed a theoretical model  
250 considering the effects of size and cell interaction on the evolution of reproductive strategies, impacting or-  
251 ganism growth. We considered clonal organisms because of their advantages of purging deleterious mutations  
252 and reducing conflicts among cells (Grosberg and Strathmann, 1998, 2007). An alternative way to form mul-  
253 ticellular organisms is “coming together”, usually responding to adverse environments (Tarnita et al., 2013;  
254 Claessen et al., 2014; Brunet and King, 2017; Amado et al., 2018; Brunet and King, 2017; van Gestel and  
255 Wagner, 2021) – but here we entirely focus on “staying together” instead, which typically leads to groups of  
256 identical cells when the probability to switch phenotypes is small. We considered cell interaction in the form  
257 of a threshold effect, where organism growth depends on the number of cooperators. We sought the optimal  
258 reproductive strategy in terms of the largest growth rate of a population. The normalised cell increment compo-  
259 nent  $\chi_n$  ( $n = 1, \dots, N$ ) represents the growth time of each cell division. The value of  $\chi_n$  and the composition  
260 of the population together determine the optimal reproductive strategy. Small  $\chi_n$  increases the growth rate of  
261 reproductive strategies. Contrarily, large  $\chi_n$  reduces the growth rate of reproductive strategies. We found that  
262 only binary-splitting reproductive strategies (producing two offspring) can be uniquely optimal. Specifically,  
263 only the binary-splitting reproductive strategy  $n + 1$  is optimal under a single size perturbation, where  $n$  is  
264 the size under perturbation, and  $n = 1, \dots, 7$ . Under the threshold effect, the contribution threshold and the  
265 cell-type switching probability determine optimal reproductive strategy. We found that the uniquely optimal  
266 reproductive strategy is the binary-splitting reproductive strategy with maximum maturity size. We found that  
267 all binary-splitting reproductive strategies can be uniquely optimal under the combined effects of size with a  
268 single perturbation and threshold. Our results show that only the binary-splitting reproductive strategies can  
269 be uniquely optimal. Every binary-splitting reproductive strategy can turn into optimal under the effects of  
270 single size perturbation and threshold. Thus, it suggests that they can readily evolve multicellularity under the  
271 combined effects of size and threshold.

272 Our finding that the uniquely optimal reproductive strategies are binary-splitting ones under the size effects  
273 coincides with the results in our previous work (Pichugin et al., 2017; Gao et al., 2019). Moreover, we found that  
274 the reproductive strategy  $n + 1$  with a bottleneck can be uniquely optimal under either size or threshold effects.  
275 The result may indicate a new advantage over the previously investigated benefits of decreasing the mutation  
276 load and regulating the cell conflict (Grosberg and Strathmann, 1998; Michod and Roze, 1999). Our results also

277 show that multiple reproductive strategies are optimal simultaneously under some special conditions, such as  
278 under  $k = 1$ . This resonates with the observation that one species can possess several reproductive strategies  
279 simultaneously in nature (Angert, 2005; Flores and Herrero, 2010; Isaksson et al., 2021; Khanna et al., 2021),  
280 such as cyanobacteria, which have reproductive strategies of binary fission, budding and multiple fission. The  
281 frequently observed reproductive strategy  $1 + 1$  among binary-splitting reproductive strategies indicates that  
282  $1 + 1$  is the best reproductive strategy under uncertain size effects.

283 In our model, we chose a flexible impact of size on organism growth. Size could have positive, negative or  
284 neutral effects on growth at each cell increment. The model assumption is corresponding to studies concerning  
285 size effect on growth (Yamamoto and Shiah, 2010; Nielsen, 2006; Li et al., 2014; Wilson et al., 2006; Li and  
286 Gao, 2004; Wilson et al., 2010). The form of size perturbations used in our work covers a wide range of  
287 size functional forms, including those investigated previously (Pichugin et al., 2017, 2019). We delineated  
288 the threshold effect of cellular interactions in a multiplayer volunteer game given the utility of game theory in  
289 depicting biological interactions ranging from social foraging to cancer development (Maynard Smith and Price,  
290 1973; Tomlinson, 1997; Dugatkin and Reeve, 2000; Nowak and Sigmund, 2004; Nowak, 2006; Kaveh et al.,  
291 2016; Wu et al., 2016; McNamara and Leimar, 2020). We use the volunteer's dilemma primarily to capture  
292 the form of cellular interactions (Diekmann, 1985; Archetti, 2009). Each cell only plays a pure reproductive  
293 strategy via its phenotype.

294 We chose the cell-type switching probability  $m = 0.01$ , because switching mostly happens under envi-  
295 ronmental pressure in nature (Gallon, 1992; Claessen et al., 2014). The low switching probability leads to a  
296 relatively homogeneous population, which mainly contains homogeneous newborn organisms. If a population  
297 has beneficial (or intermediate beneficial) newborn organisms, then homogeneous beneficial (or intermediate  
298 beneficial) newborn organisms dominate the population. Although heterogeneous beneficial newborn organ-  
299 isms grow fastest, they are not abundant, because such organisms containing one defector and one cooperator  
300 are typically growing into an organism in which there are two defectors.

## 301 5 Appendix

### 302 5.1 The probability distribution of newborn organisms

303 We show the calculation of the probabilities of producing different types of newborn organisms from a mature  
 304 organism  $(n_D, n_C)$ , where  $n_D + n_C = N$ . The probability to produce the newborn organism type  $(n'_D, n'_C)$   
 305  $(n'_D + n'_C < N)$  is calculated by

$$p(n'_D, n'_C) = \frac{\binom{n_D}{n'_D} \binom{n_C}{n'_C}}{\binom{N}{n'_D + n'_C}} \quad (5)$$

306 We take the mature organism  $(1, 2)$  in a population with reproductive strategy  $2 + 1$  as an example. The are  
 307 five newborn organisms:  $(1, 0)$ ,  $(0, 1)$ ,  $(2, 0)$ ,  $(1, 1)$  and  $(0, 2)$ . The probability of reproducing each newborn  
 308 organism is shown in Fig. 5.

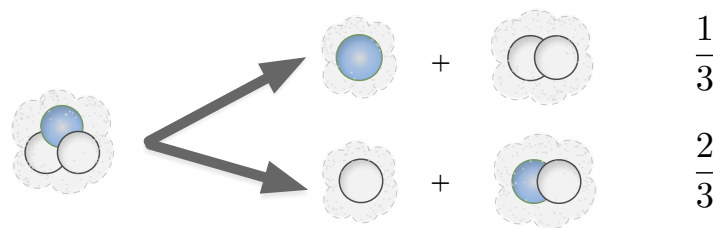

Figure 5: **The probability of producing each newborn organism from the mature organism  $(1, 2)$  in the population with reproductive strategy  $2 + 1$ .** The organism  $(1, 2)$  has the probability of  $\frac{1}{3}$  to produce a newborn organism containing one defector and a newborn organism containing two cooperators. It has the probability of  $\frac{2}{3}$  to produce a newborn organism containing one cooperator and a newborn organism containing one cooperator and one defector. However, for small  $m$  mixed mature groups occur only in small frequency.

### 309 5.2 Population growth rate

310 We illustrate the calculation of population growth rates. For the reproductive strategy  $n_1 + n_2 + \dots + n_M$  with  
 311 maturity size  $N$ , its population consists of newborn organisms with size  $n_i$ , where  $i = 1, \dots, M$ ,  $0 < n_i < N$   
 312 and  $\sum_{i=1}^M n_i = N$ . As we consider two cell types, cooperator and defector, an organism with size  $n_i$  can  
 313 have  $0, 1, \dots, n_i$  cooperators. Therefore, a newborn organism with  $n_i$  cells has  $n_i + 1$  possible compositions.  
 314 We denote the number of newborn organism types of a population by  $\Omega$ . For example, a population with  
 315 reproductive strategy  $2 + 1$  can contain the newborn organisms  $(1, 0)$ ,  $(0, 1)$ ,  $(2, 0)$ ,  $(1, 1)$  and  $(0, 2)$ . Here,  
 316 we would have  $N = 3$ ,  $n_1 = 1$ ,  $n_2 = 2$ ,  $M = 2$  and  $\Omega = 5$  (see Fig. 1D). The population growth rate  
 317 depends on the growth rate of the newborn organisms. We assume that a population contains each type of  
 318 newborn organisms initially. We track each newborn organism's growth time and the number of its offspring.  
 319 We use  $T_{ij}$  to denote the growth time of a  $i$  type newborn organism until it produces a  $j$  type newborn organism,  
 320 where  $i, j = 1, \dots, \Omega$ . We use  $N_{ij}$  to denote the number of offspring of type  $j$  offspring produced by the  $i$   
 321 type newborn organism. The growth time  $T_{ij}$  depends on the organism size and the organism composition  
 322 via Eq. (1). The number of newborn organism  $N_{ij}$  depends on the cell-type switching probability and the  
 323 cell division probabilities of each cell type. Since organism growth is stochastic,  $T_{ij}$  and  $N_{ij}$  are different for  
 324 different stochastic trajectories, see (Gao et al., 2019). For example, for the strategy  $1 + 1$ , the newborn organism  
 325  $(0, 1)$  could produce two  $(1, 0)$ , one  $(1, 0)$  or zero  $(1, 0)$  with different growth time. To capture the different  
 326 development trajectories, we simulate the stochastic organism growth and average over  $Z$  replicates. Then the

327 population growth rate is the largest root of the equation

$$\det(\mathbf{A}_{\Omega\Omega}(\lambda) - \mathbf{I}) = 0, \quad (6)$$

328 where  $A_{\Omega\Omega}$  is a  $\Omega$  by  $\Omega$  matrix with elements  $a_{ij} = \frac{\sum_{z=1}^Z N_{ij}^z e^{-\lambda T_{ij}^z}}{z}$  (De Roos, 2008; Gao et al., 2019). Here,  
 329  $T_{ij}^z$  and  $N_{ij}^z$  are the growth time and the number of offspring of the newborn organism of size  $i$  producing an  $j$   
 330 organism in  $z$ th replication.

331 The simulation of a population starts with newborn organisms. The newborn organisms differ in their  
 332 composition, i.e. they have different  $(n_D, n_C)$ . For example, for the reproductive strategy 1 + 1, the newborn  
 333 organisms are of type (1, 0) and (0, 1). Organisms grow in the following way: In each single step, a cell  
 334 (cooperator or defector) is selected to divide with its division probability, see Eq. (3). The threshold component  
 335 of growth time is  $t_{gn} = \left( \frac{n_D e^{w_{PD}} + n_C e^{w_{PC}}}{n_D + n_C} \right)^{-1}$  based on Eq. (4). The increment time for the single step is  
 336  $t_{sn} \times t_{gn}$ , where we assign values to  $t_{sn}$  according to different scenarios. With the cell division, two daughter  
 337 cells are produced. Each daughter cell switches to another cell type with a probability  $m$ . After a single step,  
 338 we update the number of cooperators and defectors of the organism. Then, the organism repeats the above  
 339 procedure to grow until reaching its maturity size. Organisms at maturity size produce offspring by random  
 340 fragmentation. The probability of producing each newborn organism is calculated by Eq. (5) in Appendix 5.1.  
 341 We obtain the number of offspring produced by the newborn organisms and the growth time (the sum of all  
 342 time increments) in a single run. We make 5000 replicates of the life cycle of each newborn organism. In  
 343 the  $z$ th replication, we record the growth time  $T_{ij}^z$  and the number of offspring  $N_{ij}^z$  for the  $j$  type newborn  
 344 organism producing the  $i$  type newborn organism. Thus, we have  $a_{ij} = \frac{\sum_{z=1}^Z N_{ij}^z e^{-\lambda T_{ij}^z}}{Z}$ , where  $Z = 5000$   
 345 for our simulations. We numerically recover our analytical results for maturity size  $N \leq 3$ , see Appendix 5.3.  
 346 For  $N \leq 3$ , we show that that only the binary-splitting reproductive strategies are uniquely optimal under size  
 347 effects only in Appendix 5.4. Our remaining conclusions are reached by numerical simulations.

### 348 **5.3 Analytical proof that smaller $\chi_n$ determines the optimal reproductive strategy** 349 **when $N \leq 3$**

350 For  $N \leq 3$ , there are only three reproductive strategies: 1 + 1, 1 + 1 + 1 and 2 + 1. The optimal reproductive  
 351 strategy is determined by the perturbation with the smaller  $\chi_n$ . More precisely, the reproductive strategy 1 + 1 is  
 352 optimal when  $\chi_1 < \chi_2$  (advantageous perturbation at  $n = 1$ ) and 2 + 1 is optimal when  $\chi_1 > \chi_2$  (advantageous  
 353 perturbation at  $n = 2$ ). 1 + 1, 1 + 1 + 1 and 2 + 1 are optimal when  $\chi_1 = \chi_2$ . The population growth rate of  
 354 each reproductive strategy is denoted by a subscript. For example,  $\lambda_{1+1}$  describes the population growth rate of  
 355 the reproductive strategy 1 + 1. The three population growth rates  $\lambda_{1+1}$ ,  $\lambda_{1+1+1}$ , and  $\lambda_{2+1}$  can be calculated  
 356 by finding the largest eigenvalue of matrix  $A$  in Eq. (6) in Appendix 5.2. We obtain

$$\lambda_{1+1} = \frac{\ln 2}{\chi_1 t_{s1}^0} = \frac{1}{\chi_1} \quad (7)$$

$$\lambda_{1+1+1} = \frac{\ln 3}{\chi_1 t_{s1}^0 + \chi_2 t_{s2}^0} \quad (8)$$

$$0 = e^{-\lambda_{1+2}(\chi_1 t_{s1}^0 + \chi_2 t_{s2}^0)} + e^{-\lambda_{1+2}\chi_2 t_{s2}^0} - 1, \quad (9)$$

357 where  $t_{sn}^0 = \ln \frac{n+1}{n}$  and  $n = 1, 2$ . Eq. (9) only provides an implicit solution for  $\lambda_{2+1}$ . The population growth  
 358 rate is always positive, as there is no cell death in our model setting.

We first focus on  $\chi_1 < \chi_2$  and prove that the reproductive strategy 1 + 1 leads to faster growth than either

1 + 1 + 1 or 2 + 1. We start by comparing 1 + 1 with 1 + 1 + 1 for  $\frac{\chi_1}{\chi_2} < 1$ ,

$$\begin{aligned}
 \frac{\lambda_{1+1}}{\lambda_{1+1+1}} &= \frac{\frac{\ln 2}{\chi_1 \ln 2}}{\frac{\ln 3}{\chi_1 \ln 2 + \chi_2 \ln \frac{3}{2}}} \\
 &= \frac{1}{\ln 3} \frac{\chi_1 \ln 2 + \chi_2 \ln \frac{3}{2}}{\chi_1} \\
 &= \frac{1}{\ln 3} \left( \ln 2 + \frac{\chi_2}{\chi_1} \ln \frac{3}{2} \right) \\
 &> \frac{1}{\ln 3} \left( \ln 2 + \ln \frac{3}{2} \right) \\
 &= 1.
 \end{aligned} \tag{10}$$

359 Thus  $\lambda_{1+1} > \lambda_{1+1+1}$  for  $\chi_1 < \chi_2$ : The reproductive strategy 1 + 1 leads to faster population growth than the  
 360 reproductive strategy 1 + 1 + 1.

Next we prove that  $\lambda_{1+1} > \lambda_{2+1}$  for  $\chi_1 < \chi_2$  by contradiction. If we would have  $\lambda_{2+1} > \lambda_{1+1} = \frac{1}{\chi_1}$ , then

$$\begin{aligned}
 0 &= e^{-\lambda_{2+1}(\chi_1 t_{s1}^0 + \chi_2 t_{s2}^0)} + e^{-\lambda_{2+1}\chi_2 t_{s2}^0} - 1 \\
 &= e^{-\lambda_{2+1}(\chi_1 \ln 2 + \chi_2 \ln \frac{3}{2})} + e^{-\lambda_{1+2}\chi_2 \ln \frac{3}{2}} - 1 \\
 &< e^{-\ln 2 - \lambda_{2+1}\chi_2 \ln \frac{3}{2}} + e^{-\lambda_{1+2}\chi_2 \ln \frac{3}{2}} - 1 \\
 &= \frac{3}{2} e^{-\lambda_{2+1}\chi_2 \ln \frac{3}{2}} - 1 \\
 &= \frac{3}{2} \left( \frac{2}{3} \right)^{\lambda_{2+1}\chi_2} - 1.
 \end{aligned}$$

This can be simplified to  $\left(\frac{2}{3}\right)^{\lambda_{2+1}\chi_2} > \frac{2}{3}$  and implies  $\lambda_{2+1}\chi_2 < 1$  or

$$\lambda_{2+1} < \frac{1}{\chi_2} < \frac{1}{\chi_1} = \lambda_{1+1}.$$

361 which contradicts the assumption of  $\lambda_{2+1} > \lambda_{1+1} = \frac{1}{\chi_1}$ . Thus  $\lambda_{1+1} > \lambda_{2+1}$  for  $\chi_1 < \chi_2$ . Thus the  
 362 reproductive strategy 1 + 1 is optimal under  $\chi_1 < \chi_2$ .

363 Now we focus on  $\chi_1 > \chi_2$  and prove that the reproductive strategy 2 + 1 leads to faster growth than either  
 364 1 + 1 or 1 + 1 + 1. We first compare 1 + 1 to 1 + 1 + 1. Since  $\frac{\chi_2}{\chi_1} < 1$ , we can revert the argument in Eq. (10)  
 365 and obtain  $\lambda_{1+1+1} > \lambda_{1+1}$ .

Next we prove – again by contradiction – that  $\lambda_{2+1} > \lambda_{1+1+1}$  for  $\chi_1 > \chi_2$ . If we would have  $\lambda_{2+1} < \lambda_{1+1+1} = \frac{\ln 3}{\chi_1 \ln 2 + \chi_2 \ln \frac{3}{2}}$ , then

$$\begin{aligned}
 0 &= e^{-\lambda_{2+1}(\chi_1 t_{s1}^0 + \chi_2 t_{s2}^0)} + e^{-\lambda_{2+1}\chi_2 t_{s2}^0} - 1 \\
 &= e^{-\lambda_{2+1}(\chi_1 \ln 2 + \chi_2 \ln \frac{3}{2})} + e^{-\lambda_{2+1}\chi_2 \ln \frac{3}{2}} - 1 \\
 &> e^{-\ln 3} + e^{-\lambda_{2+1}\chi_2 \ln \frac{3}{2}} - 1 \\
 &= \left( \frac{2}{3} \right)^{\lambda_{2+1}\chi_2} - \frac{2}{3}.
 \end{aligned}$$

This can be simplified to  $\left(\frac{2}{3}\right)^{\lambda_{2+1}\chi_2} < \frac{2}{3}$  and implies  $\lambda_{2+1}\chi_2 > 1$  or

$$\lambda_{2+1} > \frac{1}{\chi_2}.$$

On the other hand, we have for  $\chi_1 > \chi_2$

$$\begin{aligned}\lambda_{1+1+1} &= \frac{\ln 3}{\chi_1 \ln 2 + \chi_2 \ln \frac{3}{2}} \\ &< \frac{\ln 3}{\chi_2 t_{s1}^0 + \chi_2 t_{s2}^0} \\ &= \frac{1}{\chi_2},\end{aligned}\tag{11}$$

366 which implies  $\lambda_{2+1} > \lambda_{1+1+1} > \lambda_{1+1}$ . Thus the reproductive strategy 2 + 1 is optimal for  $\chi_1 > \chi_2$ .

367 The optimal reproductive strategy under a single size perturbation in the main text is the special case of  
368  $\chi_1 = 1$  or  $\chi_2 = 1$ . Thus, binary-splitting strategies are optimal for  $N \leq 3$ . Only for  $\chi_1 = \chi_2$ , all three  
369 reproductive strategies of 1 + 1, 1 + 1 + 1 and 2 + 1 have the same growth rate  $\frac{1}{\chi_1}$ . Thus, we have proven  
370 that the smaller  $\chi_n$  determines the optimal strategy. In addition, we found the optimal strategy is either 1 + 1  
371 or 2 + 1, which is consistent with the results that binary-splitting reproductive strategies are optimal under size  
372 effects, see Appendix 5.4.

#### 373 5.4 Only the binary-splitting reproductive strategies can be the optimal one under size 374 effects

375 For size effects only, the number of newborn organism types is reduced as the cell composition does not impact  
376 the population growth rate. For example, a population with reproductive strategy 2 + 1 has only two types of  
377 newborn organisms: single-celled organisms and two-celled organisms. For the reproductive strategy  $n_1 + n_2 +$   
378  $\dots + n_M$  with  $N = \sum_{i=1}^M n_i$ , the number of newborn organism types  $\Omega$  is smaller or equal to  $M$  (since  $n_i$  may  
379 be equal to  $n_j$ ). Therefore, Eq. (6) is reduces to

$$\begin{vmatrix} N_1 e^{-\lambda T_1} - 1 & N_1 e^{-\lambda T_2} & \dots & N_1 e^{-\lambda T_\Omega} \\ N_2 e^{-\lambda T_1} & N_2 e^{-\lambda T_2} - 1 & \dots & N_2 e^{-\lambda T_\Omega} \\ \vdots & \vdots & \ddots & \vdots \\ N_\Omega e^{-\lambda T_1} & N_\Omega e^{-\lambda T_2} & \dots & N_\Omega e^{-\lambda T_\Omega} - 1 \end{vmatrix} = 0.\tag{12}$$

380 Next, we simplify the determinant on the left hand side of Eq. (12) by changes lines 2 to  $\Omega$ . We multiply the  
381 first row by  $\frac{N_i}{N_1}$  and subtract the result from the  $i$ th row, where  $i \in [2, \Omega]$ . We obtain

$$\begin{vmatrix} N_1 e^{-\lambda T_1} - 1 & N_1 e^{-\lambda T_2} & \dots & N_1 e^{-\lambda T_\Omega} \\ \frac{N_2}{N_1} & -1 & \dots & 0 \\ \vdots & \vdots & \ddots & \vdots \\ \frac{N_\Omega}{N_1} & 0 & \dots & -1 \end{vmatrix} = 0.\tag{13}$$

382 Then we multiply the  $i$ th column by  $\frac{N_i}{N_1}$  and add it to the first column, where  $i \in [2, \Omega]$ . We find

$$\begin{vmatrix} \sum_{i=1}^{\Omega} N_i e^{-\lambda T_i} - 1 & N_1 e^{-\lambda T_2} & \dots & N_1 e^{-\lambda T_\Omega} \\ 0 & -1 & \dots & 0 \\ \vdots & \vdots & \ddots & \vdots \\ 0 & 0 & \dots & -1 \end{vmatrix} = 0.\tag{14}$$

383 We finally obtain

$$\sum_{i=1}^{\Omega} N_i e^{-\lambda T_i} - 1 = 0,\tag{15}$$



384 where  $i \in [1, \Omega]$ . Since newborn organisms produce identical offspring,  $N_i$  is the number of the  $i$ th type  
 385 offspring. For example, each organism produces 2 single-celled newborn organisms (the first type) and a two-  
 386 celled newborn organism (the second type) under  $1 + 1 + 2$ . Thus  $N_1 = 2$  and  $N_2 = 1$ . Thus, Eq. (15) can be  
 387 written in the following equation

$$\sum_{i=1}^M e^{-\lambda T_{n_i}} - 1 = 0, \quad (16)$$

388 Where  $T_{n_i}$  is the growth time for an organism from newborn size  $n_i$  to its maturity size  $N$ .

389 To prove that only binary-spitting reproductive strategies can be uniquely optimal, we use a similar method  
 390 to (Pichugin and Traulsen, 2020). We choose three reproductive strategies  $S_1 = n_1 + n_2 + \dots + n_M$ ,  $S_2 =$   
 391  $(n_1 + n_2) + \dots + n_M$  and  $S_3 = n_1 + n_2$ , where  $N = \sum_{i=1}^M n_i$ . We use  $\lambda_1, \lambda_2$ , and  $\lambda_3$  to denote the growth  
 392 rates of  $S_1, S_2$  and  $S_3$ , respectively. The growth rates can be calculated as roots of the equations

$$f_1(\lambda) = e^{-\lambda T_{(n_1, N)}} + e^{-\lambda T_{(n_2, N)}} + \sum_{i=3}^N e^{-\lambda T_{(n_i, N)}} - 1 = 0 \quad (17)$$

393

$$f_2(\lambda) = e^{-\lambda T_{(n_1+n_2, N)}} + \sum_{i=3}^N e^{-\lambda T_{(n_i, N)}} - 1 = 0 \quad (18)$$

394

$$f_3(\lambda) = e^{-\lambda T_{(n_1, n_1+n_2)}} + e^{-\lambda T_{(n_2, n_1+n_2)}} - 1 = 0. \quad (19)$$

395 Since the growth time  $T$  is positive, thus the above equations are monotonically decreasing functions. We  
 396 multiply Eq. (19) by  $e^{-\lambda T_{(n_1+n_2, N)}}$ . Since  $T_{(x,y)} + T_{(y,z)} = T_{(x,z)}$ , we get

$$f'_3(\lambda) = e^{-\lambda T_{(n_1, N)}} + e^{-\lambda T_{(n_2, N)}} - e^{-\lambda T_{(n_1+n_2, N)}} = 0. \quad (20)$$

397 Thus,  $f_1(\lambda) = f_2(\lambda) + f'_3(\lambda) = 0$ . Hence, we have either  $\lambda_1 = \lambda_2 = \lambda_3$ ,  $f_2(\lambda_1) > 0 > f'_3(\lambda_1)$  or  $f_2(\lambda_1) <$   
 398  $0 < f'_3(\lambda_1)$  at  $\lambda_1$ . If  $f_2(\lambda_1) < 0$  and  $f'_3(\lambda_1) > 0$ , we get  $\lambda_2 < \lambda_1 < \lambda_3$ . If  $f_2(\lambda_1) > 0$  and  $f'_3(\lambda_1) < 0$ , we get  
 399  $\lambda_3 < \lambda_1 < \lambda_2$ . Thus, uniquely optimal reproductive strategies are always the binary-splitting ones.

## References

- 400
- 401 J.T. Bonner. The origins of multicellularity. Integrative Biology, 1:27–36, 1998.
- 402 Richard K Grosberg and Richard R Strathmann. The evolution of multicellularity: A minor major transition?  
403 Annual Review of Ecology, Evolution, and Systematics, 38:621–654, 2007.
- 404 Antonis Rokas. The origins of multicellularity and the early history of the genetic toolkit for animal develop-  
405 ment. Annual review of genetics, 42:235–251, 2008.
- 406 Dennis Claessen, Daniel E. Rozen, Oscar P. Kuipers, Lotte Sogaard-Andersen, and Gilles P. van Wezel. Bac-  
407 terial solutions to multicellularity: a tale of biofilms, filaments and fruiting bodies. Nat Rev Micro, 12(2):  
408 115–124, 2014.
- 409 Arnau Sebe-Pedros, Bernard M Degnan, and Inaki Ruiz-Trillo. The origin of metazoa: a unicellular perspective.  
410 Nature Reviews Genetics, 18(8):498, 2017.
- 411 Thibaut Brunet and Nicole King. The origin of animal multicellularity and cell differentiation. Developmental  
412 cell, 43(2):124–140, 2017.
- 413 Megan C McCarthy and Brian J Enquist. Organismal size, metabolism and the evolution of complexity in  
414 metazoans. Evolutionary Ecology Research, 7(5):681–696, 2005.
- 415 Detlev Arendt. The evolution of cell types in animals: emerging principles from molecular studies. Nature  
416 Reviews Genetics, 9(11):868, 2008.
- 417 R. E. Michod and D. Roze. Cooperation and conflict in the evolution of individuality iii. In C.L. Nehaniv,  
418 editor, Mathematical and Computational Biology: Computational Morphogenesis, Hierarchical Complexity,  
419 and Digital Evolution, volume 26, pages 47 – 92. American Mathematical Society, 1999.
- 420 W. C Ratcliff, R. F Denison, M Borrello, and M Trivisano. Experimental evolution of multicellularity.  
421 Proceedings of the National Academy of Sciences USA, 109(5):1595–1600, Jan 2012.
- 422 Y. Pichugin, J. Peña, P.B. Rainey, and A. Traulsen. Fragmentation modes and the evolution of life cycles. PLoS  
423 Computational Biology, 13(11):e1005860, 2017.
- 424 Y. Pichugin, H.J. Park, and A. Traulsen. Evolution of simple multicellular life cycles in dynamic environments.  
425 Journal of the Royal Society Interface, 16:154, 2019.
- 426 Y. Gao, A. Traulsen, and Y. Pichugin. Interacting cells driving the evolution of multicellular life cycles. PLoS  
427 Computational Biology, 15(5):e1006987, 2019.
- 428 K Suresh, J Howe, GC Ng, LC Ho, NP Ramachandran, AK Loh, EH Yap, and M Singh. A multiple fission-like  
429 mode of asexual reproduction in *blastocystis hominis*. Parasitology research, 80(6):523–527, 1994.
- 430 Esther R Angert. Alternatives to binary fission in bacteria. Nature Reviews Microbiology, 3(3):214–224, 2005.
- 431 E. Flores and A. Herrero. Compartmentalized function through cell differentiation in filamentous cyanobacteria.  
432 Nature Reviews Microbiology, 8(1):39, 2010.
- 433 R. K. Grosberg and R. R. Strathmann. One cell, two cell, red cell, blue cell: the persistence of a unicellular  
434 stage in multicellular life histories. Trends in ecology & evolution, 13(3):112 – 116, 1998.
- 435 Lewis Wolpert and Eörs Szathmáry. Multicellularity: evolution and the egg. Nature, 420(6917):745–745, 2002.

- 436 E. Libby, W. C. Ratcliff, M. Travisano, and B. Kerr. Geometry shapes evolution of early multicellularity. PLoS  
437 Computational Biology, 10(9):e1003803, 2014.
- 438 M. Staps, J. van Gestel, and C.E. Tarnita. Emergence of diverse life cycles and life histories at the origin of  
439 multicellularity. Nature ecology & evolution, 3(8):1197 – 1205, 2019.
- 440 Gil JB Henriques, Simon van Vliet, and Michael Doebeli. Multilevel selection favors fragmentation modes that  
441 maintain cooperative interactions in multispecies communities. bioRxiv, 2021.
- 442 D. Kaiser. Building a multicellular organism. Annual Review of Genetics, 35(1):103–123, 2001.
- 443 Sean B Carroll. Chance and necessity: the evolution of morphological complexity and diversity. Nature, 409  
444 (6823):1102, 2001.
- 445 RM Fisher, T Bell, and S A West. Multicellular group formation in response to predators in the alga *Chlorella*  
446 *vulgaris*. Journal of evolutionary biology, 29(3):551–559, 2016.
- 447 Stefania E Kapsetaki and Stuart A West. The costs and benefits of multicellular group formation in algae.  
448 Evolution, 2019.
- 449 Gavriel Matt and James Umen. Volvox: A simple algal model for embryogenesis, morphogenesis and cellular  
450 differentiation. Developmental biology, 419(1):99–113, 2016.
- 451 Richard E Michod. Evolution of individuality during the transition from unicellular to multicellular life.  
452 Proceedings of the National Academy of Sciences, 104(suppl 1):8613–8618, 2007.
- 453 Cristian A Solari, John O Kessler, and Raymond E Goldstein. A general allometric and life-history model for  
454 cellular differentiation in the transition to multicellularity. The American Naturalist, 181(3):369–380, 2013.
- 455 Yoshimasa Yamamoto and Fuh-Kwo Shiah. Variation in the growth of *Microcystis aeruginosa* depending on  
456 colony size and position in colonies. Annales de Limnologie-International Journal of Limnology, 46(1):  
457 47–52, 2010.
- 458 Søren Laurentius Nielsen. Size-dependent growth rates in eukaryotic and prokaryotic algae exemplified by  
459 green algae and cyanobacteria: comparisons between unicells and colonial growth forms. Journal of plankton  
460 research, 28(5):489–498, 2006.
- 461 Ming Li, Wei Zhu, Xiaoxuan Dai, Man Xiao, Gloria Appiah-Sefah, and Philip Nti Nkrumah. Size-dependent  
462 growth of *Microcystis* colonies in a shallow, hypertrophic lake: use of the rna-to-total organic carbon ratio.  
463 Aquatic ecology, 48(2):207–217, 2014.
- 464 Alan E Wilson, Whitney A Wilson, and Mark E Hay. Intraspecific variation in growth and morphology of the  
465 bloom-forming cyanobacterium *Microcystis aeruginosa*. Applied and Environmental Microbiology, 72(11):  
466 7386–7389, 2006.
- 467 Yunguang Li and Kunshan Gao. Photosynthetic physiology and growth as a function of colony size in the  
468 cyanobacterium *Nostoc sphaeroides*. European Journal of Phycology, 39(1):9–15, 2004.
- 469 Alan E Wilson, RajReni B Kaul, and Orlando Sarnelle. Growth rate consequences of coloniality in a harmful  
470 phytoplankter. PLoS One, 5(1):e8679, 2010.
- 471 Krithika Kumar, Rodrigo A Mella-Herrera, and James W Golden. Cyanobacterial heterocysts. Cold Spring  
472 Harbor perspectives in biology, 2(4):a000315, 2010.

- 473 Deborah E Shelton, Alexey G Desnitskiy, and Richard E Michod. Distributions of reproductive and somatic  
474 cell numbers in diverse volvox (chlorophyta) species. Evolutionary ecology research, 14:707, 2012.
- 475 David L Kirk. Germ–soma differentiation in volvox. Developmental biology, 238(2):213–223, 2001.
- 476 D. L. Kirk. A twelve step program for evolving multicellularity and a division of labor. BioEssays, 27(3):  
477 299–310, 2005.
- 478 S. Tuljapurkar and H. Caswell, editors. Structured-Population Models in Marine, Terrestrial, and Freshwater  
479 Systems. Chapman & Hall, 1997.
- 480 André M De Roos. Demographic analysis of continuous-time life-history models. Ecology Letters, 11(1):1–15,  
481 2008.
- 482 Andreas Diekmann. Volunteer’s dilemma. Journal of conflict resolution, 29(4):605–610, 1985.
- 483 A. Traulsen, N. Shores, and M. A. Nowak. Analytical results for individual and group selection of any intensity.  
484 Bulletin of Mathematical Biology, 70:1410–1424, 2008.
- 485 C. E. Tarnita, C. H. Taubes, and M. A. Nowak. Evolutionary construction by staying together and coming  
486 together. Journal of Theoretical Biology, 320(0):10–22, 2013.
- 487 Y. Pichugin and A. Traulsen. Evolution of multicellular life cycles under costly fragmentation. PLOS  
488 Computational Biology, 16(11):e1008406, 2020.
- 489 André Amado, Carlos Batista, and Paulo RA Campos. A mechanistic model for the evolution of multicellularity.  
490 Physica A: Statistical Mechanics and its Applications, 492:1543–1554, 2018.
- 491 Jordi van Gestel and Andreas Wagner. Cryptic surface-associated multicellularity emerges through cell adhesion  
492 and its regulation. PLoS Biology, 19(5):e3001250, 2021.
- 493 Hanna Isaksson, Peter L Conlin, Ben Kerr, William C Ratcliff, and Eric Libby. The consequences of budding  
494 versus binary fission on adaptation and aging in primitive multicellularity. Genes, 12(5):661, 2021.
- 495 Kanika Khanna, Javier Lopez Garrido, Joseph Sugie, Kit Pogliano, and Elizabeth Villa. Asymmetric localiza-  
496 tion of the cell division machinery during bacillus subtilis sporulation. Elife, 10:e62204, 2021.
- 497 J. Maynard Smith and G. R. Price. The logic of animal conflict. Nature, 246:15–18, 1973.
- 498 IPM Tomlinson. Game-theory models of interactions between tumour cells. European Journal of Cancer, 33  
499 (9):1495–1500, 1997.
- 500 Lee Alan Dugatkin and Hudson Kern Reeve. Game theory and animal behavior. Oxford University Press on  
501 Demand, 2000.
- 502 M. A. Nowak and K. Sigmund. Evolutionary dynamics of biological games. Science, 303:793–799, 2004.
- 503 Martin A Nowak. Evolutionary dynamics: Exploring the equations of life. Harvard University Press, 2006.
- 504 K. Kaveh, C. Veller, and M. A. Nowak. Games of multicellularity. Journal of Theoretical Biology, 403:143 –  
505 158, 2016.
- 506 B. Wu, J. Arranz, J. Du, D. Zhou, and A. Traulsen. Evolving synergetic interactions. Journal of The Royal  
507 Society Interface, 13:20160282, 2016.

508 John M McNamara and Olof Leimar. Game theory in biology: concepts and frontiers. Oxford University Press,  
509 USA, 2020.

510 Marco Archetti. The volunteer's dilemma and the optimal size of a social group. Journal of Theoretical Biology,  
511 261(3):475–480, 2009.

512 J.R. Gallon. Tansley review no. 44. reconciling the incompatible: N<sub>2</sub> fixation and o<sub>2</sub>. New Phytologist, pages  
513 571–609, 1992.
